# Supplementary material for: Small RNAs from the wheat stripe rust fungus (Puccinia striiformis f.sp. tritici)
Source: PubMed Central journal article supplement (PMC4578785; doi:10.1186/s12864-015-1895-4), 2015-09-21

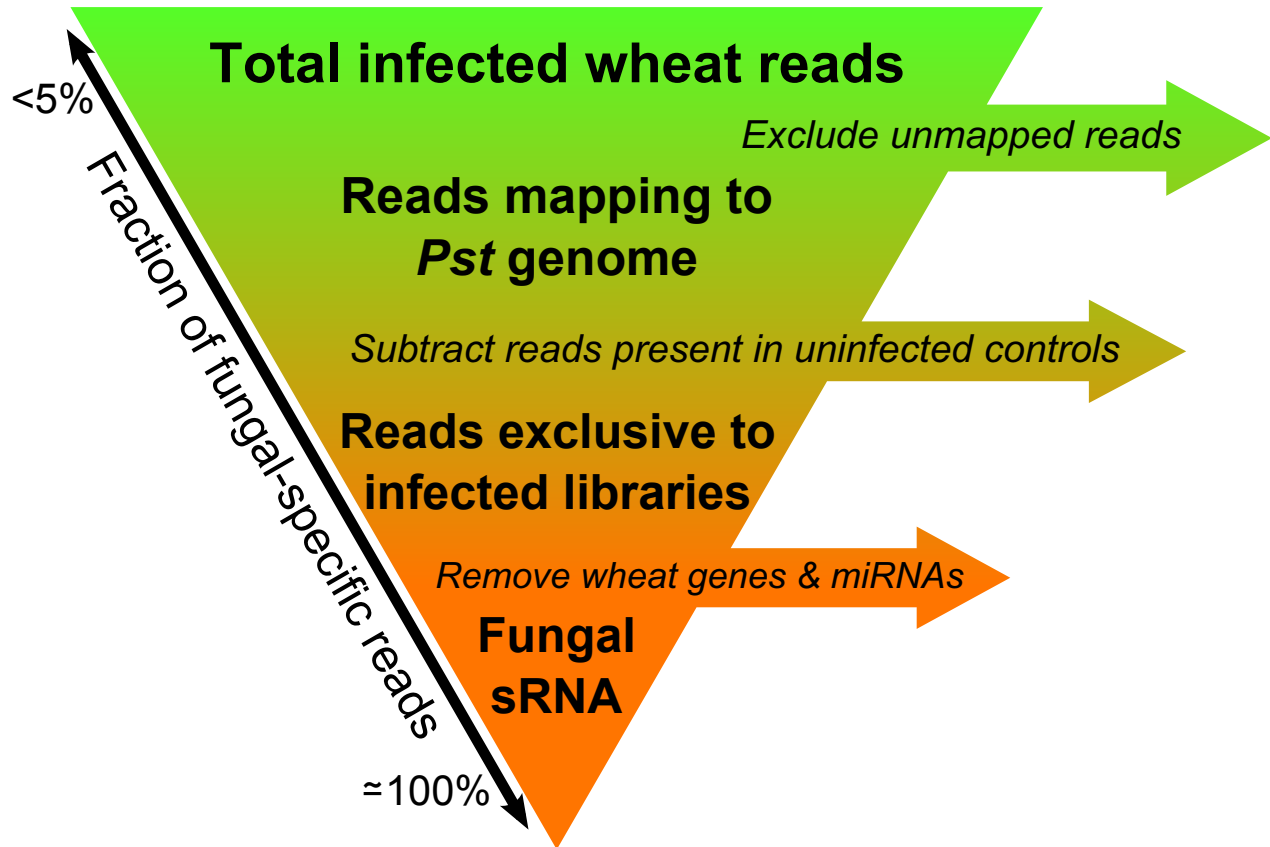

Supplement: 12864_2015_1895_MOESM1_ESM.pdf [file 12864_2015_1895_MOESM1_ESM.pdf]
